# Supplementary material for: Effects of Feed Supplementation on Nesfatin-1, Insulin, Glucagon, Leptin, T3, Cortisol, and BCS in Milking Ewes Grazing on Semi-Natural Pastures
Source: MDPI journal article supplement (doi:10.3390/ani11030682), 2021-03-04
Supplement: s1 [file s1]

# Effects of Feed Supplementation on Nesfatin-1, Insulin, Glucagon, Leptin, T3, Cortisol, and BCS in Milking Ewes Grazing on Semi-Natural Pastures

Olimpia Barbato, Elena De Felice, Luca Todini, Laura Menchetti, Alessandro Malfatti, Paola Scocco

## Material and methods

### Experimental trial

The trial was carried out on 24 Comisana x Appenninica pluriparous lactating ewes. Animals at the moment of the offspring separation (near 40 days post-partum) were divided in two homogeneous groups as far as body weight (BW) and Body Condition Score (BCS), parity, days of lactation and milk yield. All animals were 3 years old, had 2 parity with 1 lamb/pregnancy. One group (supplemented group, SUP, n=12, mean BW 49.4±6.1, mean BCS 2.31±0.3; mean milk production 306±64 mL/d) was supplemented with 600 g/day/animal of corn and barley (1:1), while the other group (control unsupplemented group, UNS, n=12, mean BW 50.5±5.1, mean BCS 2.27±0.3; mean milk production 297±63 mL/d) fed only with the pasture. Hormone levels and BCS were evaluated before the supplementation on 7 July (T0) and, after this date, every 9-10 days until 22 August (T1-T5). The date of 22 August corresponded to the pre-mating period, when males were introduced in the flock and all females were dried. Experimental trial scheme is showed in Figure S1

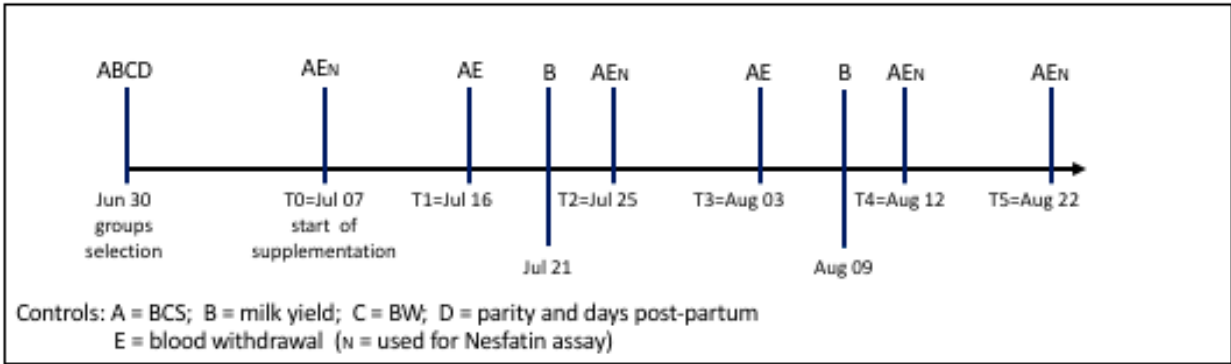

Figure S1. Experimental trial scheme

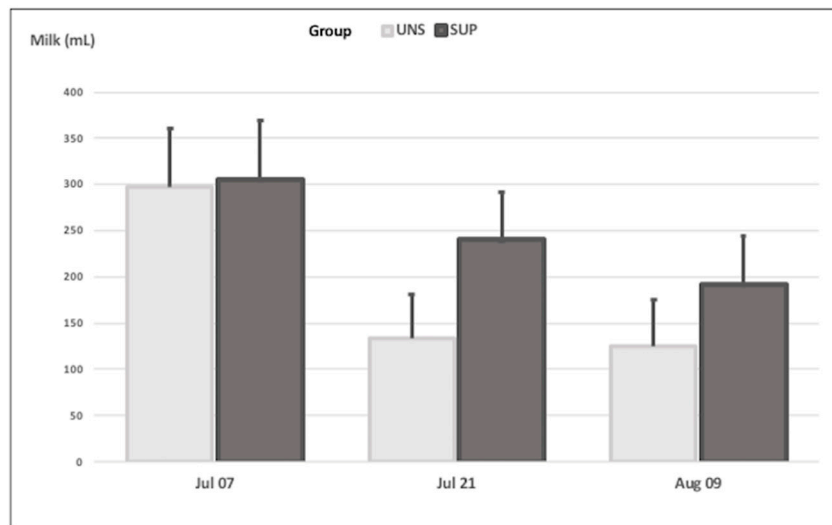

**Figure S2.** Means and standard errors of milk production at morning milking (mL) in control (UNS) and supplemented (SUP) lactating sheep. Milk yield was recorded as manually collected milk by each animal.

**Table S1.** Mean and standard error (SE), and median (Mdn) with interquartile range (IQR) of Nesfatin-1 concentrations in control (UNS) and supplemented ewe (SUP) before the administration of supplementation (T0), and after 20 (T2), 40 (T4), and 50 (T5) days of supplementation.

| GROUP | TIME               |                         |                     |                          |                    |                          |                     |                          |
|-------|--------------------|-------------------------|---------------------|--------------------------|--------------------|--------------------------|---------------------|--------------------------|
|       | T0                 |                         | T2                  |                          | T4                 |                          | T5                  |                          |
|       | Mean $\pm$ SE      | Mdn (IQR)               | Mean $\pm$ SE       | Mdn (IQR)                | Mean $\pm$ SE      | Mdn (IQR)                | Mean $\pm$ SE       | Mdn (IQR)                |
| UNS   | 104.43 $\pm$ 66.53 | 16.57<br>(12.96, 61.76) | 194.09 $\pm$ 101.34 | 43.93<br>(14.70, 123.54) | 200.81 $\pm$ 95.25 | 36.54<br>(14.96, 263.21) | 139.22 $\pm$ 104.90 | 47.71<br>(11.89, 358.07) |
| SUP   | 93.86 $\pm$ 75.65  | 12.23<br>(10.46, 32.75) | 64.64 $\pm$ 49.49   | 15.32<br>(13.34, 17.85)  | 94.96 $\pm$ 74.82  | 14.90<br>(12.41, 37.64)  | 50.21 $\pm$ 37.96   | 12.90<br>(10.61, 70.71)  |
